# Supplementary material
Source: PubMed Central journal article supplement (PMC8611690)
Supplement: NIHMS1717325-supplement-Supplemental_Material.pdf [file NIHMS1717325-supplement-Supplemental_Material.pdf]

**Supplemental Table 1**

*Bivariate Correlations for Key Study Variables at During Pandemic-Related Shutdown Surveys*

|                         | Parenting Behaviors |                    |                         |                   | Parent-Child Relational Qualities |                   |                   |                   | Sibling Relational Qualities |                    |                    |
|-------------------------|---------------------|--------------------|-------------------------|-------------------|-----------------------------------|-------------------|-------------------|-------------------|------------------------------|--------------------|--------------------|
|                         | Family Chaos        | Parental Knowledge | Educational Involvement | Autonomy Granting | Maternal Intimacy                 | Paternal Intimacy | Maternal Conflict | Paternal Conflict | Sibling Intimacy             | Sibling Disclosure | Sibling Negativity |
| Family Chaos            | --                  | -.14**             | -.03                    | -.09*             | -.05                              | -.11*             | .16**             | .14**             | -.19***                      | -.10*              | .22***             |
| Parental Knowledge      | -.14**              | --                 | .46***                  | .22***            | .34***                            | .15**             | -.15**            | -.18***           | .20***                       | .24***             | -.06               |
| Educational Involvement | -.06                | .43***             | --                      | -.03              | .16**                             | .04               | .01               | -.00              | .08                          | .15**              | -.02               |
| Autonomy Granting       | -.10*               | .20***             | .09*                    | --                | .18***                            | .15**             | -.24***           | -.22***           | .08                          | .01                | -.07               |
| Maternal Intimacy       | .04                 | .32***             | .10*                    | .02               | --                                | .46***            | -.24***           | -.16**            | .34***                       | .23***             | -.10*              |
| Paternal Intimacy       | -.10*               | .19***             | .02                     | .05               | .30***                            | --                | -.21***           | -.05              | .33***                       | .18***             | -.13**             |
| Maternal Conflict       | .12**               | -.16**             | -.05                    | -.11*             | -.20***                           | -.16**            | --                | .71**             | -.13**                       | -.08               | .32***             |
| Paternal Conflict       | .09*                | -.17***            | -.08                    | -.05              | -.13**                            | -.01              | .58***            | --                | -.09*                        | -.07               | .26***             |
| Sibling Intimacy        | -.13**              | .21***             | .04                     | -.01              | .36***                            | .30***            | -.07              | -.11*             | --                           | .46***             | -.38***            |
| Sibling Disclosure      | -.04                | .26***             | .02                     | .02               | .30***                            | .24***            | -.04              | -.01              | .47***                       | --                 | -.14**             |
| Sibling Negativity      | .18***              | -.01               | -.01                    | -.06              | -.08                              | -.18***           | .29***            | .24***            | -.32***                      | -.13**             | --                 |

*Note.* Reports about or from older siblings are below the diagonal. Reports about or from younger siblings are above the diagonal.

\*  $p < .05$ . \*\*  $p < .01$ . \*\*\*  $p < .001$ .
